# Supplementary material
Source: PubMed Central journal article supplement (PMC3442273)
Supplement: emboj2012225s7.pdf [file emboj2012225s7.pdf]

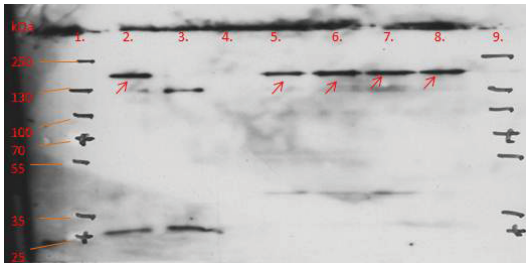

SFig1B, anti-GFP

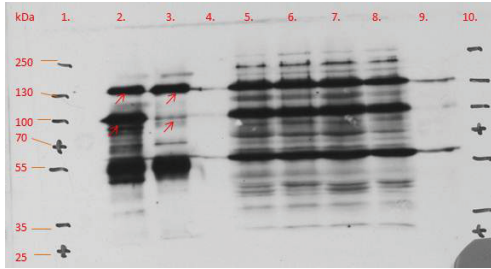

SFig1B, anti-Atg13 and anti-TAP

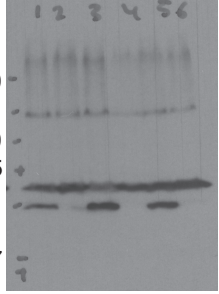

Figure S1B, anti-Ape1

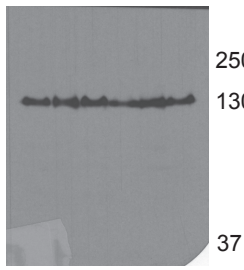

Figure S1B, anti-PAP

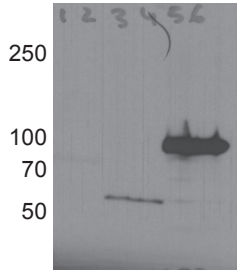

short exposure

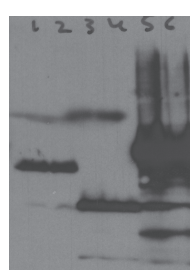

long exposure

Figure S1B, anti-GFP

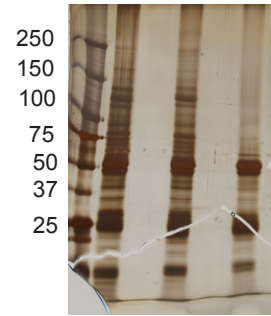

Figure S1C, silver stain

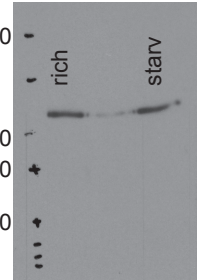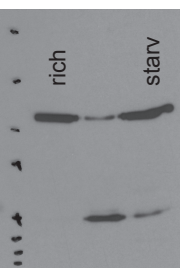

Figure S1D, anti-TAP

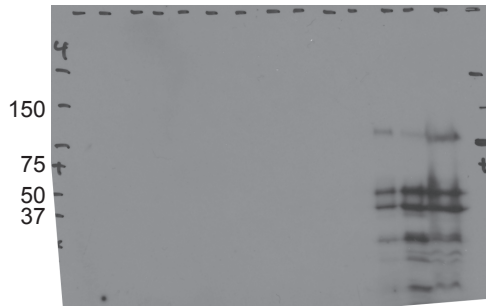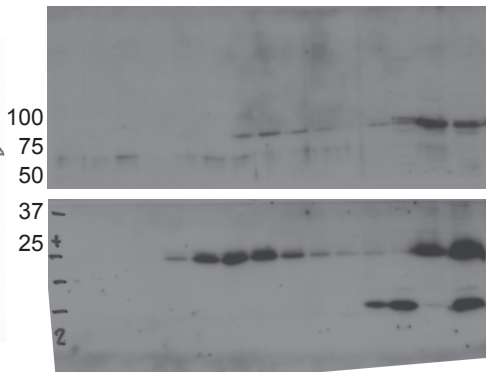

Figure S1G, anti-HA, calnexin and caveolin1

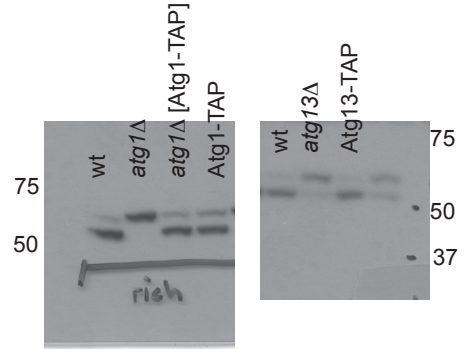

Figure S1E, anti-Ape1

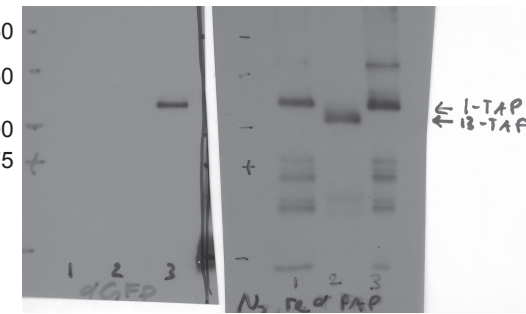

Figure S1F, anti-GFP and PAP

Figure S1
